# Supplementary material
Source: PubMed Central journal article supplement (PMC3384132)
Supplement: 1201652109_pnas.201201652SI.pdf [file 1201652109_pnas.201201652SI.pdf]

# Supporting Information

Durand et al. 10.1073/pnas.1201652109

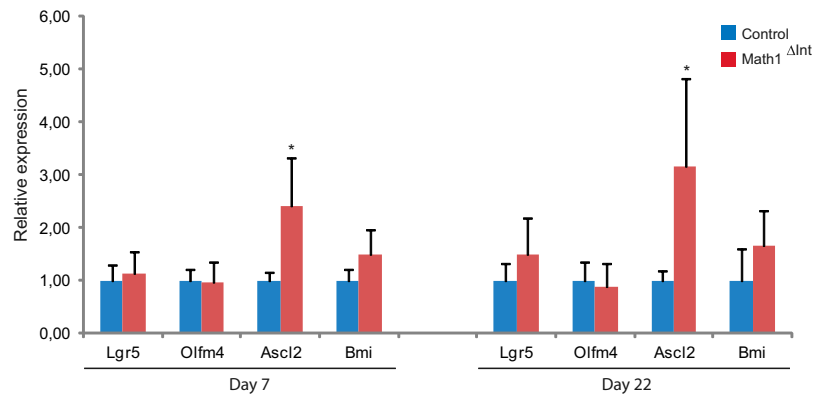

**Fig. S1.**  $Math1$  expression is dispensable for stem cell marker expression. Real-time quantitative RT-PCR analysis of stem cell markers in the small intestine of control and  $Math1^{\Delta int}$  mice 7 and 22 d after Tam injections. No significant differences were observed except for those marked by an asterisk, where  $*P < 0.05$ .

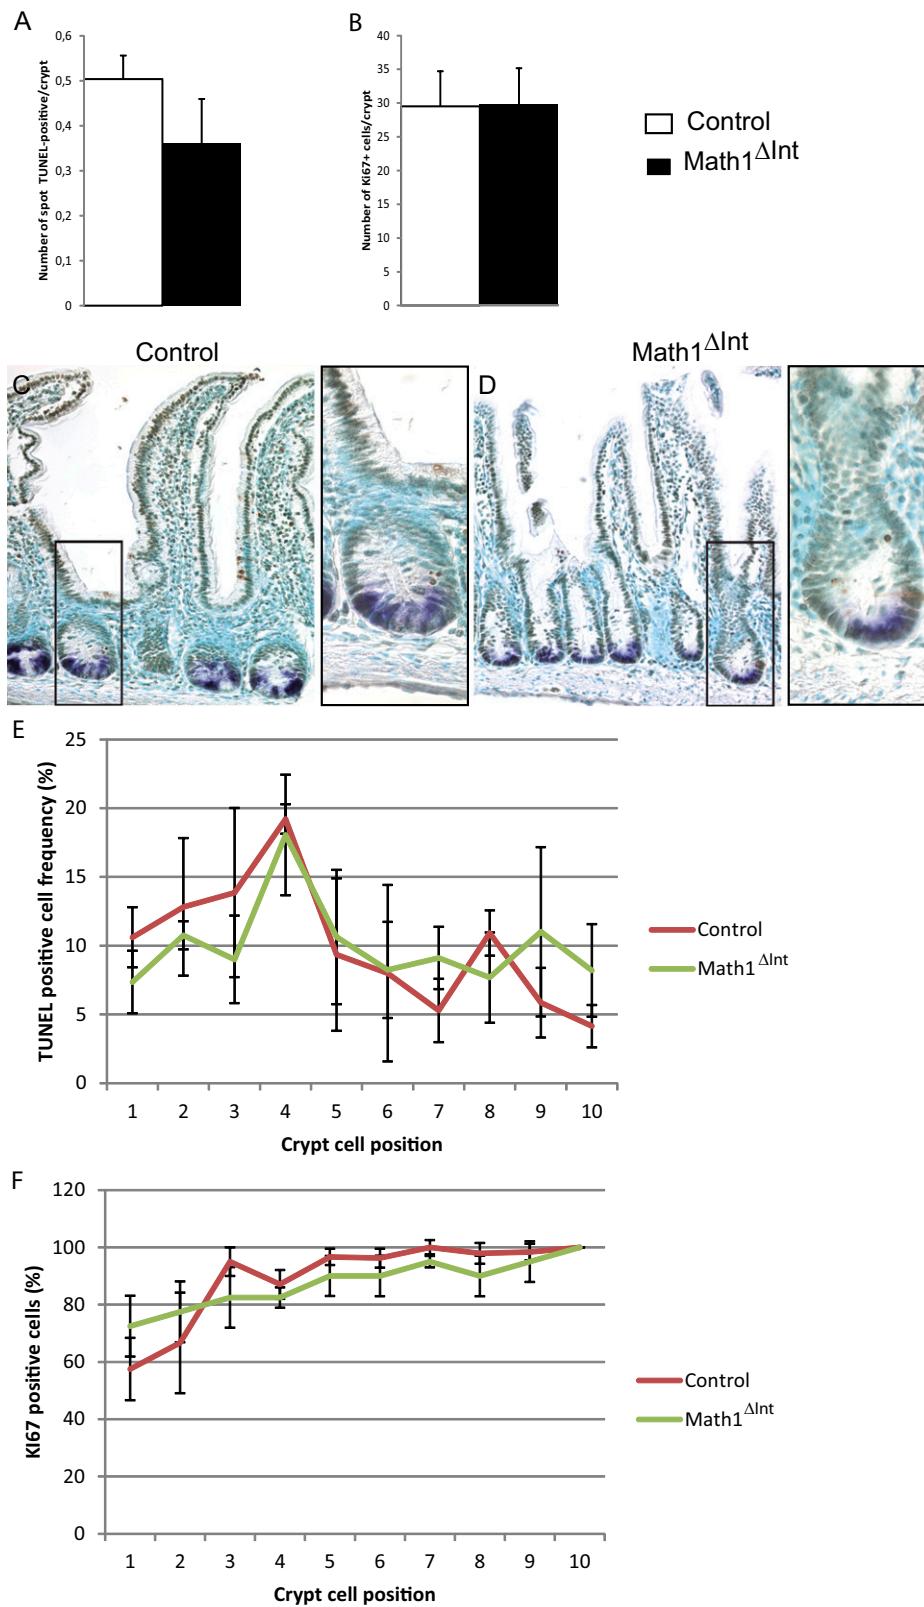

**Fig. S2.** Similar cell proliferation and apoptosis in Math1-deficient crypt. (A and B) Quantification of number of spot TUNEL-positive (A) and Ki67-positive (B) cells per crypt section in control and Math1 mutant mice 7 d after Tam injection. No significant differences were observed. (C and D) Representative sections of TUNEL labeling in control (C) and Math1 mutant (D) mice 7 d after Tam injection. (E and F) Frequency of TUNEL-positive cells (E) and percentage of Ki67 (F) at individual crypt cell position (from 1 to 10) in control and Math1 mutant mice 7 d after Tam injection. CBCs are localized at the base of the crypt, and the Bmi<sup>+</sup> are located predominantly at four cells above the base of the crypt (+4). No significant differences were observed.

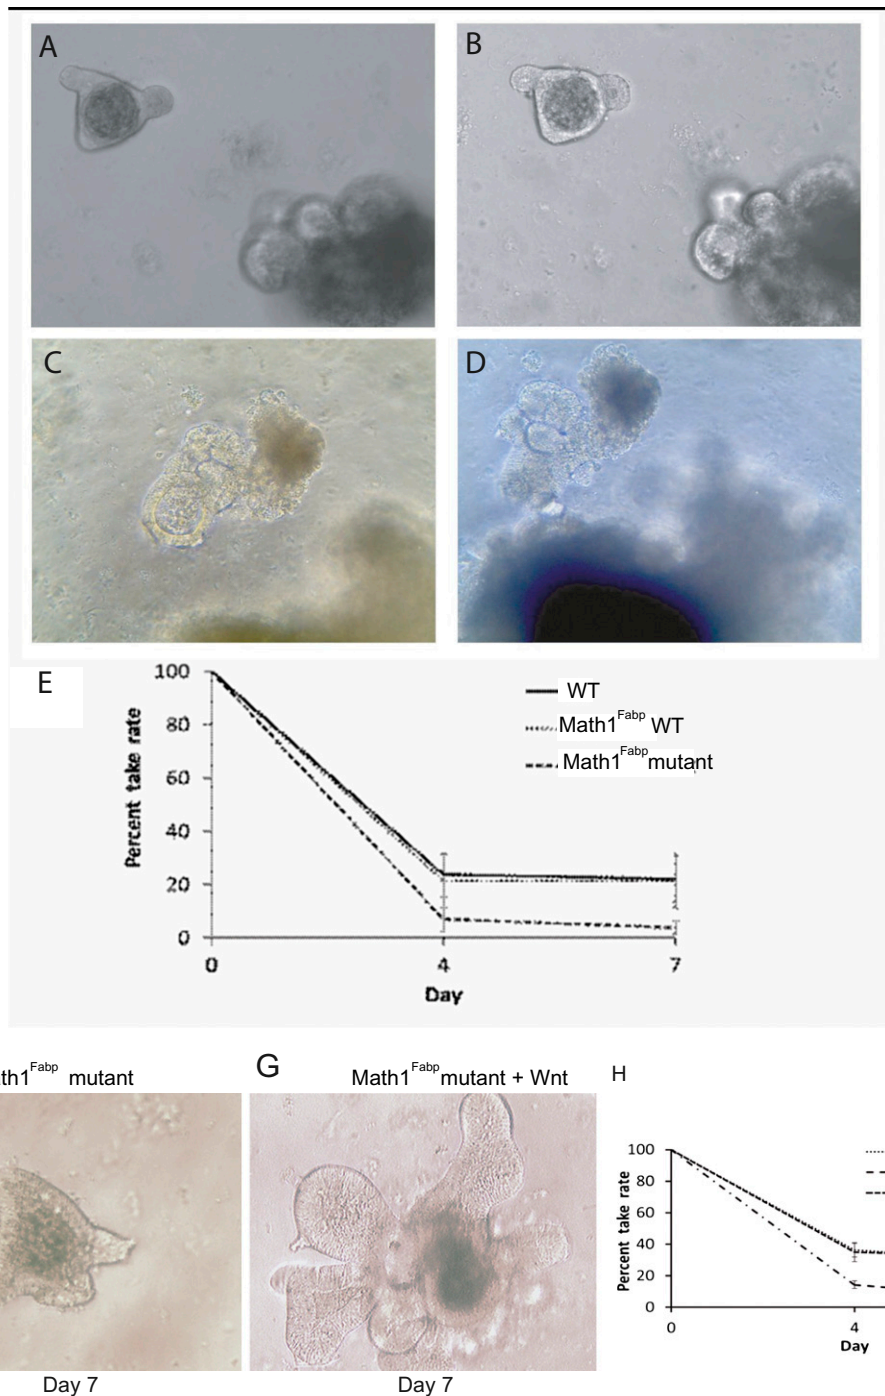

**Fig. S3.** Math1<sup>FABP</sup> mutant organoids can survive in the presence of wild-type organoids or additional Wnt3 ligand. Culture of mosaic Math1<sup>FABP</sup> crypts over a period of 2 wk. Math1<sup>FABP</sup> mutant crypts, identified by lack of Paneth cell granules, that were established near Math1<sup>FABP</sup> wild-type crypts formed nascent spheroids, which grew at a significantly slower rate compared with wild type organoids as seen at 4 d (A), 7 d (B), 12 d (C), and 16 d (D). (E) Frequency of organoid formation from wild-type and mutant crypts ( $n = 4$  wild-type mice, 998 crypts;  $n = 4$  Math1<sup>FABP</sup> mice, 1,426 crypts). Crypts from Math1<sup>FABP</sup> mutant crypts were cultured in normal media (F) and in media supplemented with Wnt3a (G). (H) Addition of Wnt3a restored the frequency of organoid formation in Math1<sup>FABP</sup> mutant crypts to a level comparable to wild type organoids.

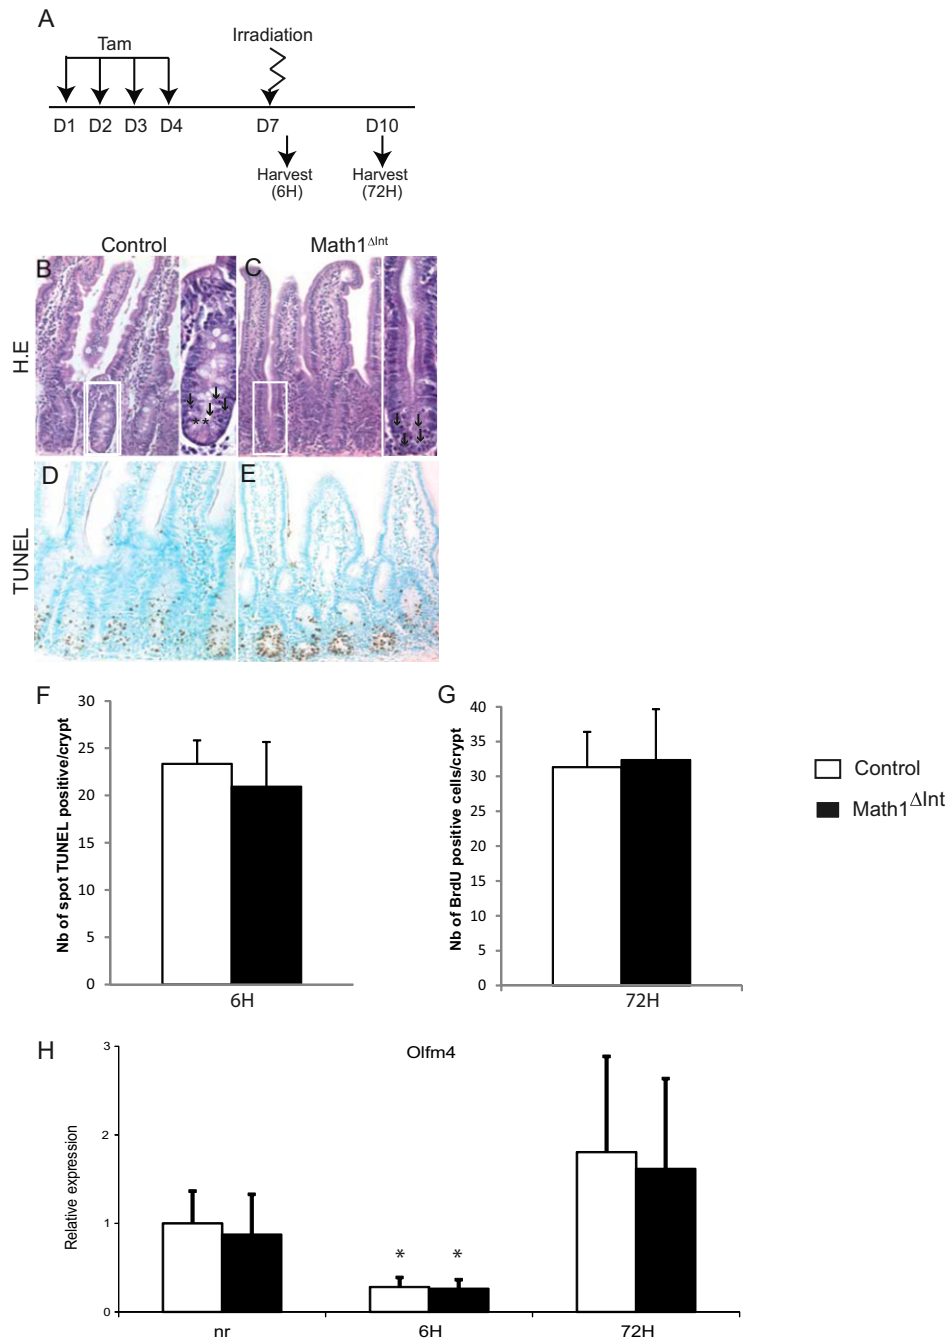

**Fig. 54.** Math1 deletion has no effect on intestinal crypt cell apoptosis after radiation injury. (A) Treatment schema: Tam was injected into control and Math1 mutant mice for 4 consecutive days before they were irradiated (10 Gy) on day 7 after the first injection. Animals were killed 6 or 72 h after irradiation. H.E. (B and C) and TUNEL staining (D and E) demonstrate that similar levels of apoptotic cells were present in control and Math1 mutant mice 6 h after irradiation. (F and G) Quantification of the number of spot TUNEL-positive per crypt section (F) and BrdU-positive cells (G), respectively, 6 and 72 h after irradiation in control and Math mutant mice. (H) Real-time quantitative RT-PCR analysis of Olfm4 in the small intestine of control and Math mutant mice before and after irradiation (6 and 72 h). nr, nonirradiated. Significant difference was observed between nr mice and irradiated mice at 6 h after irradiation (\* $P < 0.05$ ).

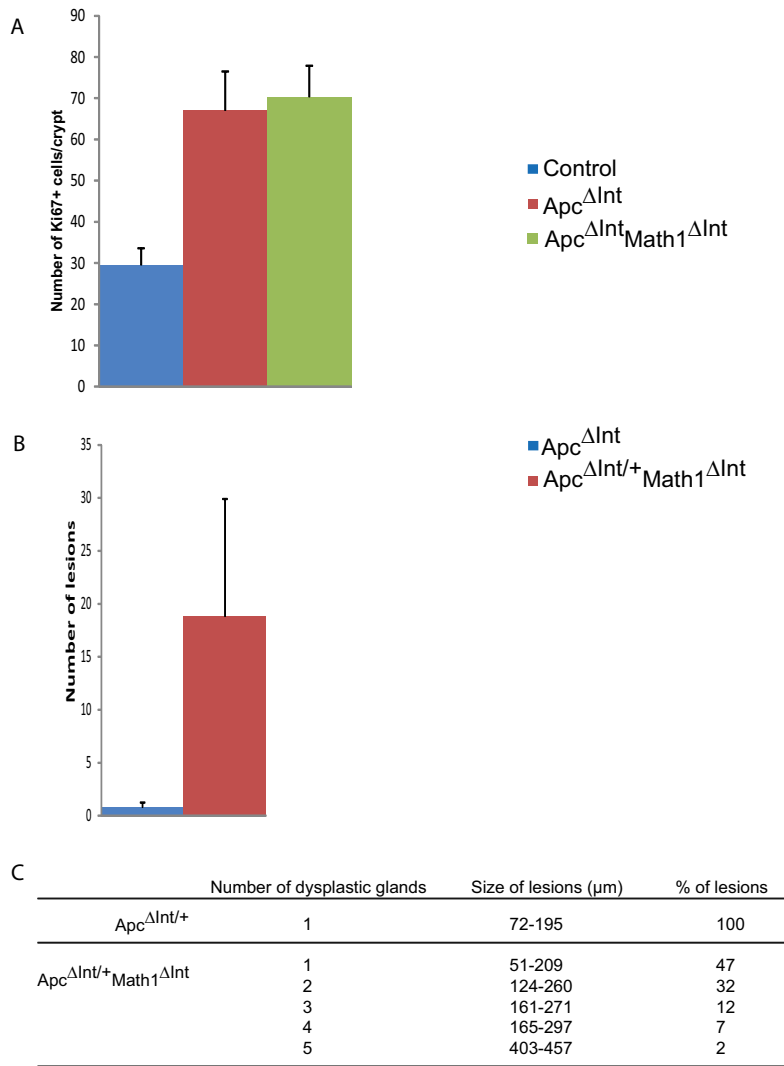

**Fig. S5.** Analysis of cell proliferation in Apc and Apc Math1 mutant mice. (A) Quantification of Ki67-positive cells in control, Apc<sup>ΔInt</sup>, and Apc<sup>ΔInt</sup>Math1<sup>ΔInt</sup> 5 d after Tam injections. No significant difference between Apc<sup>ΔInt</sup> and Apc<sup>ΔInt</sup>Math1<sup>ΔInt</sup> was observed. (B) Quantification of intestinal lesions observed in Apc<sup>ΔInt/+</sup> and Apc<sup>ΔInt/+</sup>Math1<sup>ΔInt</sup> at 22 d after Tam injection (*P* < 0.01). (C) Table describing the size and the percentage of each lesions depending on the number of dysplastic glands observed in each genotype in Apc<sup>ΔInt/+</sup> and Apc<sup>ΔInt/+</sup>Math1<sup>ΔInt</sup> at 22 d after Tam injection.

**Table S1. Target genes found misexpressed in small intestine of adult and young Math1<sup>Δint</sup> mice**

| Affymetrix ID                       | Symbol    | Name                                                       | Fold differences            |                             |
|-------------------------------------|-----------|------------------------------------------------------------|-----------------------------|-----------------------------|
|                                     |           |                                                            | Adult Math1 <sup>Δint</sup> | Young Math1 <sup>Δint</sup> |
| <b>Down-regulated target genes</b>  |           |                                                            |                             |                             |
| <b>Secretory lineage</b>            |           |                                                            |                             |                             |
| 1449822                             | Math1     | Mouse atonal homolog 1                                     | 32.0                        | 13.4                        |
| <b>Paneth cell markers</b>          |           |                                                            |                             |                             |
| 1449478                             | MMP7      | Matrix metalloproteinase 7                                 | 160.4                       | 78.8                        |
| 1450631                             | DEFCR24   | Defensin related cryptdin 24                               | 152.8                       | 93.5                        |
| 1436857                             | DEFCR21   | Defensin related cryptdin 21                               | 116.7                       | 149.2                       |
| 1450709                             | DEFCR5    | Defensin related cryptdin 5                                | 104.7                       | 75.4                        |
| 1418282                             | SERPINA1  | Serpin peptidase inhibitor clade A                         | 21.7                        | 8.8                         |
| 1419204                             | DLL1      | Delta-like 1                                               | 2.1                         | 2.8                         |
| <b>Goblet cell markers</b>          |           |                                                            |                             |                             |
| 1416306                             | CLCA1     | Chloride channel accessory 1                               | 1369.4                      | 410.8                       |
| 1428435                             | MUC2      | Mucin 2                                                    | 837.5                       | 185.4                       |
| 1417370                             | TFF3      | Trefoil factor 3                                           | 742.5                       | 128.0                       |
| 1426872                             | FCGBP     | Fc fragment of IgG binding protein                         | 467.8                       | 325.6                       |
| 1450220                             | SPDEF     | SAM pointed domain containing ets transcription factor     | 11.5                        | 7.2                         |
| 1455802                             | AGR2      | Anterior gradient homolog 2                                | 8.4                         | 9.0                         |
| 1427119                             | SPINK4    | Serine peptidase inhibitor Kazal type 4                    | 1.6                         | 87.9                        |
| <b>Enteroendocrine cell markers</b> |           |                                                            |                             |                             |
| 1434137                             | LOC653808 | Zymogen granule membrane protein                           | 877.8                       | 276.7                       |
| 1422860                             | NTS       | Neurotensin                                                | 17.4                        | 24.3                        |
| 1415885                             | CHGB      | Chromogranin B                                             | 11.4                        | 6.6                         |
| 1421594                             | SYTL2     | Synaptotagmin-like 2                                       | 11.3                        | 8.9                         |
| 1424865                             | PYY       | Peptide YY                                                 | 9.8                         | 9.1                         |
| 1418805                             | SCT       | Secretin                                                   | 7.3                         | 7.8                         |
| 1418149                             | CHGA      | Chromogranin A                                             | 4.7                         | 4.1                         |
| 1426413                             | NEUROD1   | Neurogenic differentiation 1                               | 1.7                         | 3.0                         |
| <b>Others</b>                       |           |                                                            |                             |                             |
| 1420437                             | IDO1      | Indoleamine 2,3-dioxygenase 1                              | 75.5                        | 181.8                       |
| 1435939                             | HEPACAM2  | HEPACAM family member 2                                    | 30.0                        | 15.4                        |
| 1415837                             | KLK2      | Kallikrein-related peptidase 2                             | 21.2                        | 11.7                        |
| 1417266                             | CCL6      | Chemokine (C-C motif) ligand 6                             | 19.1                        | 11.8                        |
| 1419665                             | NUPR1     | Nuclear protein 1                                          | 13.1                        | 5.7                         |
| 1422876                             | CAPN9     | Calpain 9                                                  | 9.9                         | 4.6                         |
| 1420334                             | SLC12A8   | Solute carrier family 12 member 8                          | 8.6                         | 3.1                         |
| 1451498                             | LRRRC26   | Leucine rich repeat containing 26                          | 8.4                         | 3.3                         |
| 1427063                             | KIAA1324  | KIAA1324                                                   | 7.8                         | 3.4                         |
| 1449564                             | TPSG1     | Tryptase $\gamma$ 1                                        | 7.1                         | 2.4                         |
| 1417481                             | RAMP1     | Receptor (G protein-coupled) activity modifying protein 1  | 6.1                         | 2.3                         |
| 1419248                             | RGS2      | Regulator of G protein signaling                           | 4.5                         | 3.2                         |
| 1438676                             | GBP6      | Guanylate binding protein family member 6                  | 4.2                         | 19.3                        |
| 1429123                             | RAB27A    | RAB27A                                                     | 3.7                         | 3.6                         |
| 1427308                             | DAB1      | Disabled homolog 1                                         | 3.7                         | 2.4                         |
| 1449896                             | MLPH      | Melanophilin                                               | 3.0                         | 2.3                         |
| 1458347                             | TMPRSS2   | Transmembrane protease serine 2                            | 2.9                         | 2.5                         |
| 1425853                             | PRLR      | Prolactin receptor                                         | 2.6                         | 3.1                         |
| 1434140                             | MCF2L     | MCF.2 cell line derived transforming sequence-like         | 2.5                         | 3.0                         |
| 1457269                             | GM1123    | Gene model 1123                                            | 2.4                         | 1.6                         |
| 1417985                             | NRARP     | NOTCH-regulated ankyrin repeat protein                     | 2.4                         | 3.2                         |
| 1420505                             | STXBP1    | Syntaxin binding protein 1                                 | 2.2                         | 2.0                         |
| 1435043                             | PLCB1     | Phospholipase C $\beta$ 1                                  | 2.2                         | 1.5                         |
| 1425216                             | FFAR2     | Free fatty acid receptor 2                                 | 2.1                         | 2.0                         |
| 1449556                             | HLA-E     | Major histocompatibility complex, class I, E               | 2.1                         | 4.4                         |
| 1416950                             | TNFAIP8   | Tumor necrosis factor $\alpha$ -induced protein 8          | 2.0                         | 2.9                         |
| 1421211                             | CIITA     | Class II, major histocompatibility complex, transactivator | 2.0                         | 2.8                         |
| 1441793                             | RNF39     | Ring finger protein 39                                     | 2.0                         | 1.6                         |
| 1417898                             | GZMA      | Granzyme A                                                 | 2.0                         | 22.3                        |

Table S1. Cont.

| Affymetrix ID             | Symbol     | Name                                                                               | Fold differences            |                             |
|---------------------------|------------|------------------------------------------------------------------------------------|-----------------------------|-----------------------------|
|                           |            |                                                                                    | Adult Math1 <sup>Δint</sup> | Young Math1 <sup>Δint</sup> |
| 1458591                   | RASEF      | RAS and EF-hand domain containing                                                  | 1.9                         | 2.1                         |
| 1436297                   | GRINA      | Glutamate receptor ionotropic <i>N</i> -methyl<br>D-aspartate-associated protein 1 | 1.9                         | 2.6                         |
| 1418891                   | RAB3D      | RAB3D                                                                              | 1.9                         | 1.5                         |
| 1439773                   | LY6E       | Lymphocyte antigen 6 complex, locus E                                              | 1.9                         | 2.5                         |
| 1418734                   | BE136769   | Expressed sequence BE136769                                                        | 1.8                         | 2.6                         |
| 1419295                   | CREB3L1    | cAMP responsive element binding<br>protein 3-like 1                                | 1.8                         | 1.8                         |
| 1431008                   | HLA-B      | Major histocompatibility complex, class I, B                                       | 1.8                         | 4.3                         |
| 1418240                   | GBP2       | Guanylate binding protein 2                                                        | 1.7                         | 19.4                        |
| 1453913                   | TAP2       | Transporter 2 ATP-binding cassette<br>subfamily B                                  | 1.7                         | 4.2                         |
| 1441850                   | TCN2       | Transcobalamin II                                                                  | 1.7                         | 1.6                         |
| 1449875                   | H2-T10     | Histocompatibility 2, T region locus 10                                            | 1.7                         | 3.3                         |
| 1450350                   | JDP2       | Jun dimerization protein 2                                                         | 1.7                         | 3.4                         |
| 1455251                   | ITGA1      | Integrin $\alpha$ 1                                                                | 1.6                         | 1.8                         |
| 1455566                   | LOC26010   | Viral DNA polymerase-transactivated protein 6                                      | 1.5                         | 2.5                         |
| 1450534                   | HLA-C      | Major histocompatibility complex, class I, C                                       | 1.5                         | 2.4                         |
| 1418392                   | GBP4       | Guanylate binding protein 4                                                        | 1.5                         | 9.4                         |
| Up-regulated target genes |            |                                                                                    |                             |                             |
| 1416930                   | LY6D       | Lymphocyte antigen 6 complex locus D                                               | 8.7                         | 8.8                         |
| 1448894                   | TCAG7.1260 | Aldo-keto reductase family 1 member B10-like                                       | 5.6                         | 5.2                         |
| 1451385                   | FAM162A    | Family with sequence similarity 162 member A                                       | 5.3                         | 3.3                         |
| 1421041                   | GSTA5      | GST $\alpha$ 5                                                                     | 4.8                         | 13.4                        |
| 1417932                   | IL18       | Interleukin 18                                                                     | 4.0                         | 5.9                         |
| 1420715                   | PPARG      | Peroxisome proliferator-activated receptor $\gamma$                                | 2.7                         | 1.8                         |
| 1449424                   | PLEK2      | Pleckstrin 2                                                                       | 2.7                         | 1.8                         |
| 1439148                   | PFKL       | Phosphofructokinase                                                                | 2.5                         | 2.6                         |
| 1420499                   | GCH1       | GTP cyclohydrolase 1                                                               | 2.3                         | 2.7                         |
| 1429299                   | DDAH1      | Dimethylarginine dimethylaminohydrolase 1                                          | 2.2                         | 2.3                         |
| 1438376                   | TRIM27     | Tripartite motif-containing 27                                                     | 2.2                         | 1.7                         |
| 1447745                   | AQP4       | Aquaporin 4                                                                        | 2.0                         | 2.4                         |
| 1450455                   | AKR1C12    | Aldo-keto reductase family 1 member C12                                            | 2.0                         | 3.2                         |
| 1425933                   | NT5C2      | 5-Nucleotidase cytosolic II                                                        | 2.0                         | 2.5                         |
| 1449005                   | SLC16A3    | Solute carrier family 16 member 3                                                  | 1.9                         | 1.9                         |
| 1447807                   | PLEKHH1    | Pleckstrin homology domain containing<br>family H member 1                         | 1.9                         | 1.9                         |
| 1417122                   | VAV3       | vav 3 guanine nucleotide exchange factor                                           | 1.8                         | 4.2                         |
| 1460351                   | LOC729659  | S100 calcium binding protein A11<br>pseudogene                                     | 1.8                         | 3.1                         |
| 1435917                   | OCIAD2     | OCIA domain containing 2                                                           | 1.8                         | 3.2                         |
| 1416614                   | EID1       | EP300 interacting inhibitor of differentiation 1                                   | 1.8                         | 1.5                         |
| 1417772                   | GRHPR      | Glyoxylate reductase/hydroxypyruvate<br>reductase                                  | 1.8                         | 3.3                         |
| 1420641                   | SQRDL      | Sulfide quinone reductase-like                                                     | 1.7                         | 2.1                         |
| 1417308                   | PKM2       | Pyruvate kinase                                                                    | 1.7                         | 2.2                         |
| 1444632                   | BC064078   | cDNA sequence BC064078                                                             | 1.6                         | 1.5                         |
| 1448249                   | GPD1       | Glycerol-3-phosphate dehydrogenase 1                                               | 1.6                         | 2.4                         |
| 1429764                   | FAM101B    | Family with sequence similarity 101 member B                                       | 1.6                         | 2.7                         |
| 1449324                   | ERO1L      | ERO1-like                                                                          | 1.6                         | 1.6                         |
| 1416165                   | RAB31      | RAB31                                                                              | 1.5                         | 2.2                         |
| 1456769                   | DUSP3      | Dual specificity phosphatase 3                                                     | 1.5                         | 1.5                         |
| 1417293                   | HS6ST1     | Heparan sulfate 6-O-sulfotransferase 1                                             | 1.5                         | 1.7                         |
| 1435536                   | RSC1A1     | Regulatory solute carrier protein family 1<br>member 1                             | 1.5                         | 1.5                         |
| 1441931                   | GSS        | Glutathione synthetase                                                             | 1.5                         | 1.8                         |
| 1422076                   | ACOT4      | Acyl-CoA thioesterase 4                                                            | 1.5                         | 2.4                         |
| 1434794                   | RHOF       | ras homolog gene family member F                                                   | 1.5                         | 2.0                         |
